# Supplementary material for: The Effectiveness of Traditional Chinese Yijinjing Qigong Exercise for the Patients With Knee Osteoarthritis on the Pain, Dysfunction, and Mood Disorder: A Pilot Randomized Controlled Trial
Source: PubMed Central journal article supplement (PMC8787110; doi:10.3389/fmed.2021.792436), 2022-01-11
Supplement: Data_Sheet_1.pdf [file Data_Sheet_1.pdf]

Table 1 Multivariate analysis (linear regression) of gender associated with outcomes

| Dependent variable                       | Independent variable | B             | Standard error | Beta          | P            | R2           | Adjusted-R2  | Durbin-Watson |
|------------------------------------------|----------------------|---------------|----------------|---------------|--------------|--------------|--------------|---------------|
| WOMAC pain score (range 0–50)            | Gender               | -1.272        | 2.95           | 0.084         | 0.331        | 0.046        | 0.005        | 1.378         |
| WOMAC stiffness score (range 0–20)       | Gender               | -0.018        | 1.85           | -0.004        | 0.929        | 0.003        | -0.039       | 1.601         |
| WOMAC joint function score (range 0–170) | Gender               | -1.32         | 4.93           | -0.12         | 0.704        | 0.015        | -0.027       | 1.181         |
| VAS score for pain on walking            | Gender               | -0.469        | 1.11           | -0.186        | 0.401        | 0.038        | -0.003       | 1.915         |
| <b>MCS score</b>                         | <b>Gender</b>        | <b>5.636</b>  | <b>9.71</b>    | <b>0.223</b>  | <b>0.001</b> | <b>0.277</b> | <b>0.247</b> | <b>1.436</b>  |
| PCS score                                | Gender               | -1.277        | 7.44           | -0.007        | 0.867        | 0.006        | -0.036       | 1.946         |
| <b>BDI score</b>                         | <b>Gender</b>        | <b>-1.219</b> | <b>3.39</b>    | <b>-0.142</b> | <b>0.002</b> | <b>0.237</b> | <b>0.205</b> | <b>1.286</b>  |
| <b>PSS score</b>                         | <b>Gender</b>        | <b>0.702</b>  | <b>2.62</b>    | <b>0.114</b>  | <b>0.04</b>  | <b>0.114</b> | <b>0.076</b> | <b>1.833</b>  |
| BBS score                                | Gender               | -1.325        | 3.17           | -0.185        | 0.38         | 0.04         | 0.001        | 0.813         |
| Stride velocity(m/s)                     | Gender               | -0.086        | 0.11           | -0.319        | 0.09         | 0.096        | 0.058        | 1.47          |
| Stride length(m)                         | Gender               | -0.023        | 0.052          | -0.194        | 0.315        | 0.048        | 0.007        | 1.82          |
| Stance phase time(s)                     | Gender               | 0.027         | 0.09           | 0.131         | 0.593        | 0.022        | -0.02        | 2.087         |
| Swing phase time(s)                      | Gender               | 0.009         | 0.83           | 0.048         | 0.668        | 0.017        | -0.025       | 2.159         |
